# Supplementary material for: Safety and biodistribution of a double-deleted oncolytic vaccinia virus encoding CD40 ligand in laboratory Beagles
Source: PubMed Central journal article supplement — Mol Ther Oncolytics. 2014 Dec 10;1:14002–. doi: 10.1038/mto.2014.2 (PMC4782937; doi:10.1038/mto.2014.2), 2014-12-10
Supplement: mto20142-s1.pdf [file mto20142-s1.pdf]

## Supplementary Material

**Table S1.** Serum clinical chemistry of the study dogs.

| Day <sup>a</sup>       | Dog 1      |            | Dog 2       |           |             |             |             | Ref.      |        |
|------------------------|------------|------------|-------------|-----------|-------------|-------------|-------------|-----------|--------|
|                        | 0          | 1          | 0           | 7         | 14          | 21          | 28          | Value     | Unit   |
| <b>ALP</b>             | <b>111</b> | <b>373</b> | 63          | 89        | 83          | 83          | 92          | 33-215    | u/l    |
| <b>ALT</b>             | 43         | 53         | 64          | 47        | 43          | 30          | 30          | 18-77     | u/l    |
| <b>Albumin</b>         | 31.5       | 30.2       | <b>29.7</b> | <b>28</b> | <b>29.1</b> | <b>28.9</b> | <b>26.2</b> | 30-41     | g/l    |
| <b>Bilirubin total</b> | 1.4        | 1.4        | 2           | 2.8       | 2.7         | 3.7         | 2.9         | 2.5-8.5   | µmol/l |
| <b>Phosphate</b>       | 1.41       | 1.12       | 0.97        | 1.06      | 1.16        | 1.21        | 1.21        | 0.93-2.25 | mmol/l |
| <b>Glucose</b>         | 5.4        | 4.8        | 4.3         | 4.7       | 4.3         | 4.6         | 4.7         | 4.0-6.4   | mmol/l |
| <b>Potassium</b>       | 4.5        | 4.9        | 4.8         | 4.8       | 5           | 5.4         | 5.5         | 4.2-5.4   | mmol/l |
| <b>Sodium</b>          | 151        | 152        | 147         | 148       | 148         | 147         | 144         | 147-157   | mmol/l |
| <b>Calcium</b>         | 2.49       | 2.47       | 2.56        | 2.56      | 2.73        | 2.73        | 2.67        | 2.3-3.0   | mmol/l |
| <b>Cholesterol</b>     | 2.6        | 3.1        | 3.2         | 3.6       | 3.2         | 3.1         | 3.3         | 3.7-9.8   | mmol/l |
| <b>Creatinine</b>      | 72         | 74         | 59          | 63        | 65          | 59          | 66          | 57-116    | µmol/l |
| <b>Protein</b>         | 56         | 56         | <b>60</b>   | <b>60</b> | <b>64</b>   | <b>69</b>   | <b>70</b>   | 58-77     | g/l    |
| <b>Urea</b>            | 6.2        | 4.6        | 3.4         | 2.8       | 3.7         | 4.1         | 3.3         | 2.4-8.8   | mmol/l |

<sup>a</sup>From the 1<sup>st</sup> virus infusion, Day 0 is baseline before virus infusion

ALT, alanine aminotransferase

ALP, alkaline phosphatase

**Table S2.** Administration schedule of oncolytic vaccinia virus, vvdd-hCD40L-tdTomato, in the study dogs.

| <b>Dog number</b> | <b>Dose number</b> | <b>Dose (TCID<sub>50</sub><sup>a</sup>/kg)</b> | <b>Weigh (kg)</b> | <b>Total Dose (TCID<sub>50</sub>)</b> | <b>Administration schedule</b> | <b>Endpoint/Euthanasia</b> |
|-------------------|--------------------|------------------------------------------------|-------------------|---------------------------------------|--------------------------------|----------------------------|
| 1                 | 1                  | 1.2 x 10 <sup>8</sup>                          | 12.8              | 4 x 10 <sup>9</sup>                   | Single infusion                | 24 h after virus infusion  |
| 2                 | 1                  | 1.2 x 10 <sup>8</sup>                          | 14.0              | 1.7 x 10 <sup>9</sup>                 | Infusions given once           | 1 wk after 4 <sup>th</sup> |
|                   | 2-4                | 0.8 x 10 <sup>8</sup>                          |                   | 1.1 x 10 <sup>9</sup>                 | per week for 4 times           | virus infusion             |

<sup>a</sup>TCID<sub>50</sub> = the amount of virus required to kill 50% of infected cells
